# Supplementary material
Source: PubMed Central journal article supplement (PMC3754146)
Supplement: AEM.01598-13_zam999104699so1.pdf [file AEM.01598-13_zam999104699so1.pdf]

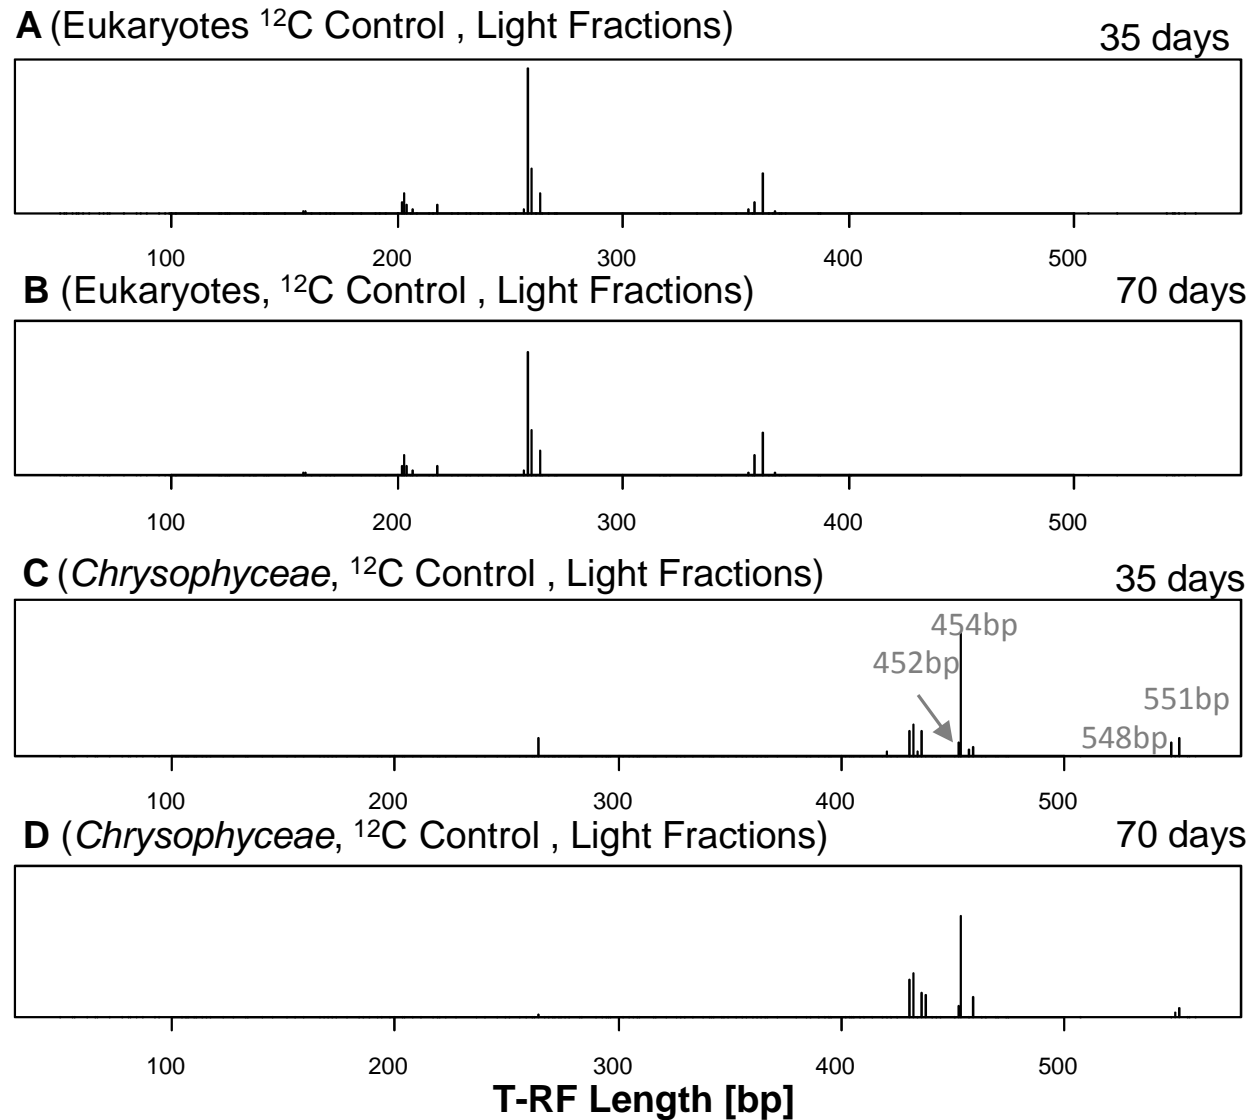

**Fig. S1.** T-RFLP patterns of Eukaryotes (A and B) and *Chrysophyceae* (C and D) in light fractions of gradients of the  $^{12}\text{C}$  control treatments. Grey numbers, TRFs that have similar but different sizes than those that represented  $^{13}\text{C}$ -labelled phylotypes of *Chrysophyceae* (Fig. 2).

**Table S1.** Selected protistan phylotypes of the 18S rRNA libraries derived from pooled “light” and “heavy” RNA fractions using eukaryote specific primers.

| Phylogenetic group        | Range of % Similarity <sup>a</sup>           | Start <sup>b</sup> |      | 70 days <sup>b</sup> |      |
|---------------------------|----------------------------------------------|--------------------|------|----------------------|------|
|                           |                                              | anoxic             | oxic | anoxic               | oxic |
| Alveolata<br>(Ciliophora) | Oligohymenophorea; Peritrichia               | 99                 |      |                      | 57   |
|                           | Litostomatea; Haptoria; Spathidiidae         | 98-99              | 1    | 3                    |      |
|                           | Spirotrichea; Stichotrichia;<br>Oxytrichidae | 99                 | 1    |                      |      |
| Alveolata                 | Apicomplexa; Eimeriidae                      | 97-99              | 3    | 9                    | 7    |
|                           | Colpodellidae                                | 90                 |      | 1                    |      |
| Amoebozoa                 | Euamoebida                                   | 95-99              | 9    |                      | 3    |
|                           | Euamoebida; Tubulinida                       | 86                 |      |                      | 1    |
|                           | Euamoebida; Tubulinida;<br>Hartmannellidae   | 94-99              | 5    |                      | 4    |
|                           | Centramoebida; Balamuthiidae                 | 86                 | 2    |                      |      |
|                           | Mycetozoa; Dictyostelium                     | 100                | 1    |                      |      |
| Chlorophyta               | Trebouxiophyceae                             | 96-100             | 6    | 6                    | 12   |
|                           | Chlorophyceae; Sphaeropleales                | 98-99              |      | 2                    | 1    |
|                           | Chlorophyceae; Chlamydomonadales             | 97-99              | 12   | 13                   | 5    |
|                           | Chlorophyceae; Pseudotetracystis             | 99                 | 1    |                      | 2    |
|                           | Chlorophyceae; Scenedesmaceae                | 98-100             | 26   | 17                   | 21   |
|                           | Chlorophyceae; Dictyococcus                  | 99                 | 1    |                      |      |
|                           | Chlorophyceae; Radiococcus                   | 99                 | 1    |                      |      |
|                           | Ulvophyceae                                  | 99                 |      | 1                    |      |

<sup>a</sup>, sequence similarity to the next related sequence in the nucleotide database of Genbank.

<sup>b</sup>, absolute abundance of phylotype in gene library.

**Table S2** Fungal phylotypes of the 18S rRNA libraries derived from pooled “light” and “heavy” RNA fractions using eukaryote specific primers.

| Phylogenetic Group                 | Range of %<br>Similarity <sup>a</sup> | Start <sup>b</sup> |      | 70 days <sup>b</sup> |      |      |
|------------------------------------|---------------------------------------|--------------------|------|----------------------|------|------|
|                                    |                                       | Anoxic             | Oxic | Anoxic               | Oxic |      |
| Unknown Ascomycota                 | 95-98                                 | 3.9                |      |                      |      |      |
| Mitosporic Ascomycota              | 97-100                                | 28.6               | 10.2 | 17.6                 | 44.4 |      |
| Saccharomycota                     | 100                                   |                    | 1.7  |                      |      |      |
| Pezizomycotina; Dothideomycetes    | 98-100                                | 7.8                | 5.1  | 11.8                 |      |      |
| Pezizomycotina; Eurotiomycetes     | 99-100                                | 2.6                | 8.5  |                      | 3.7  |      |
| Pezizomycotina; Laboulbeniomycetes | 99                                    | 3.9                |      | 5.9                  |      |      |
| Pezizomycotina; Pezizomycetes      | 94-98                                 | 1.3                | 3.4  |                      |      |      |
| Pezizomycotina; Leotiomycetes      | 98-99                                 |                    |      | 2.9                  | 3.7  |      |
| Pezizomycotina; Sordariomycetes    | Verticillium                          | 98-100             | 5.2  | 3.4                  |      |      |
|                                    | Hypocrea                              | 99-100             |      | 8.5                  |      |      |
|                                    | Fusarium                              | 98-99              | 3.9  |                      | 5.9  |      |
|                                    | Microascales                          | 96-99              | 3.9  | 8.5                  | 17.6 | 3.7  |
|                                    | Coniochaeta                           | 98-100             | 2.6  |                      |      |      |
|                                    | Giberella                             | 100                |      | 1.7                  |      | 3.7  |
|                                    | Ophiocordiceps                        | 99-100             |      | 6.8                  |      | 7.4  |
|                                    | Lecythophora                          | 98-100             | 16.9 | 18.6                 | 14.7 | 14.8 |
|                                    | Chaetomiaceae                         | 97-100             | 13   | 18.6                 |      |      |
|                                    | Lasiophaeris                          | 98-100             | 1.3  |                      | 8.8  |      |
|                                    | Acremonium                            | 95-100             | 5.2  | 5.1                  |      | 7.4  |
|                                    | Melanospora                           | 98-99              |      |                      | 5.9  |      |
|                                    | Ceratosystiopsis                      | 97                 |      |                      | 2.9  |      |
|                                    | Podospora                             | 99                 |      |                      | 2.9  |      |
|                                    | Cordiceps                             | 99                 |      |                      | 2.9  |      |
|                                    | Menispora                             | 99                 |      |                      |      | 7.4  |
|                                    | Doratomyces                           | 99                 |      |                      |      | 3.7  |

<sup>a</sup>, sequence similarity to the next related sequence in the nucleotide database of Genbank.

<sup>b</sup>, relative abundance of phylotype in gene library in percent.

**Table S3.** Assignment of T-RFs to detected phylotypes in 18S rRNA libraries using eukaryotic-specific primers. Analyzed were samples taken at 70 days from oxic treatments that were supplemented with [<sup>13</sup>C-u]cellulose. These sequences are results of a second clone library. A more extensive library that was retrieved from combined “light” and “heavy” RNA fractions is shown in Table 1.

| Clone | T-RF [bp] | Next relative                                                        | % Sequence identity <sup>a</sup> |
|-------|-----------|----------------------------------------------------------------------|----------------------------------|
| D6    | 182       | Uncultured <i>Scolecobasidium</i> clone LL76( mitosporic Ascomycota) | 100                              |
| B8    | 203       | <i>Scotiellopsis terrestris</i> (Chlorophyceae; Scenedesmaceae)      | 100                              |
| A10   | 205       | <i>Vischeria punctata</i> UTEX 153 (Stramenopiles)                   | 99                               |
| B10   | 217       | <i>Xanthonema</i> sp. 735 (Stramenopiles)                            | 99                               |
| F2    | 230       | Ciliate                                                              | 99                               |
| H1    | 249       | <i>Mayamaea atomus</i> var. <i>atomus</i> (Stramenopiles)            | 99                               |
| G1    | 257       | <i>Lecythophora hoffmannii</i> (Ascomycota; Lecythophora)            | 99                               |
| H6    | 262       | <i>Cryptococcus terreus</i> (Basidiomycota)                          | 100                              |
| D8    | 266       | <i>Hyphochytrium catenoides</i> (Stramenopiles)                      | 99                               |
| H3    | 342       | <i>Opisthnecta minima</i> (Ciliophora; Peritrichia)                  | 98                               |
| B12   | 343       | <i>Opisthnecta minima</i> (Ciliophora; Peritrichia)                  | 99                               |
| H2    | 344       | <i>Opisthnecta minima</i> (Ciliophora; Peritrichia)                  | 98                               |
| C2    | 362       | <i>Psathyrella candolleana</i> AFTOL-ID 1507 (Basidiomycota)         | 99                               |
| F10   | 369       | <i>Pleurochloris meiringensis</i> (Stramenopiles)                    | 99                               |
| E6    | 369       | <i>Malawimonas jakobiformis</i> (Malawimonadidae flagellates)        | 91                               |
| B11   | 370       | <i>Proleptomonas faecicola</i> (Cercozoa)                            | 100                              |
| F3    | 371       | <i>Malawimonas jakobiformis</i> (Malawimonadidae flagellates)        | 96                               |
| F1    | 375       | Uncultured Chytridiomycota clone T5P1AeC06 (Fungi; Chytridiomycetes) | 88                               |
| A3    | 387       | Hartmannellidae environmental clone Amb_18S_1090 (Amoebozoa)         | 99                               |

<sup>a</sup>, sequence similarity to the next related sequence in the nucleotide database of Genbank.

**Table S4.** Assignment of T-RFs to detected phylotypes in 18S rRNA libraries using *Chrysophyceae*-specific primers. Analyzed were samples taken at 70 days from oxic treatments that were supplemented with [<sup>13</sup>C-u]cellulose.

| Clone | T-RF [bp] | Next relative                                   | % Sequence identity <sup>a</sup> |
|-------|-----------|-------------------------------------------------|----------------------------------|
| H12   | 263       | Uncultured stramenopile clone MLBM27            | 99                               |
| G10   | 268       | Ochromonas vasocystis strain CCMP2741           | 96                               |
| C11   | 300       | Leukarachnion sp. ATCC PRA-24                   | 92                               |
| A5    | 429       | Chrysophyceae sp. CCCM41                        | 99                               |
| B2    | 430       | Chrysophyceae sp. CCCM41                        | 99                               |
| A8    | 431       | Synura curtispina strain CCMP847                | 94                               |
| C10   | 432       | Mallomonas peroneides var. bangladeshica strain | 94                               |
| A2    | 435       | Chrysophyceae sp. CCCM41                        | 98                               |
| D2    | 436       | Chrysophyceae sp. CCCM41                        | 93                               |
| D1    | 437       | Spumella-like flagellate 1027                   | 99                               |
| E5    | 438       | Leukarachnion sp. ATCC PRA-24                   | 95                               |
| G6    | 452       | Soil flagellate AND30                           | 98                               |
| D3    | 452       | Spumella-like flagellate 1243                   | 98                               |
| F11   | 453       | Spumella-like flagellate 1243                   | 98                               |
| D11   | 454       | Leukarachnion sp. ATCC PRA-24                   | 92                               |
| G9    | 457       | Spumella-like flagellate 1243                   | 98                               |
| G8    | 458       | Leukarachnion sp. ATCC PRA-24                   | 96                               |
| B5    | 465       | Spumella-like flagellate JBNA46                 | 97                               |

<sup>a</sup>, sequence similarity to the next related sequence in the nucleotide database of Genbank.
